# Supplementary material for: iPSCs in Neurodegenerative Disorders: A Unique Platform for Clinical Research and Personalized Medicine
Source: MDPI journal article supplement (doi:10.3390/jpm12091485), 2022-09-10
Supplement: s1 [file s1]

Supplementary Table S2: Case Report published for Alzheimer's disease in PUBMED

| S. No. | Article Type   | Journal        | Author                                                                                                                                               | Topic                                                                                                                                                                                         | Year       | Cell line    | Gender | Age                               | Reprogramming                                                                               | Source            | Disease                         |
|--------|----------------|----------------|------------------------------------------------------------------------------------------------------------------------------------------------------|-----------------------------------------------------------------------------------------------------------------------------------------------------------------------------------------------|------------|--------------|--------|-----------------------------------|---------------------------------------------------------------------------------------------|-------------------|---------------------------------|
| 1      | Case Report    | Stem Cell Res  | Wang J et al.                                                                                                                                        | Induced pluripotent stem cells derived from one 70-years-old male donor with the APOE-ε4/ε4 alleles                                                                                           | 2021       | HEBHMUi008-A | Male   | 70                                | Sendai virus mediated delivery of OCT3/4, SOX2, cMYC and KLF4                               | PBMC              | Cerebral artery insufficiency   |
| 2      |                | Stem Cell Res. | Zhang L et al.                                                                                                                                       | Generation of induced pluripotent stem cell line (IPTi002-A) from an 87-year old sporadic Alzheimer's disease patient with APOE3 (ε3/ε3) genotype                                             | 2021       | IPTi002-A    | Female | 85                                | Transgene free, Episomal plasmid                                                            | PBMC              | AD                              |
| 3      |                | Stem Cell Res. | Wang Z et al.                                                                                                                                        | Generation of induced pluripotent stem cell line (ZZUi0024-A) from a 51-year-old patient with APP gene mutation in Alzheimer' s disease                                                       | 2021       | ZZUi0024-A   | Female | 51                                | Electroporated with episomal plasmids                                                       | Skin fibroblasts  | AD                              |
| 4      |                | Stem Cell Res  | Dai Q et al.                                                                                                                                         | Generation of an induced pluripotent stem cell line (SIAISi003-A) from a 79-year-old patient with Alzheimer's disease having APOE3/4 genetic background                                       | 2020       | SIAISi003-A  | Female | 79                                | Transgene free, episomal plasmids                                                           | PBMC              | AD                              |
| 5      |                | Cell Prolif.   | Li L et al.                                                                                                                                          | Pathological manifestation of the induced pluripotent stem cell-derived cortical neurons from an early-onset Alzheimer's disease patient carrying a presenilin-1 mutation (S170F)             | 2020       | PS1-S170F    | Male   | 33                                | Sendai virus vector which expresses four reprogramming factors (OCT3/4, SOX2, cMYC and KLF4 | PBMC              | AD                              |
| 6      |                | Stem Cell Res. | Yan YI et al.                                                                                                                                        | Establishment of SIAISi001-A, an induced pluripotent stem cell (iPSC) line from 66-year old mild cognitive impairment (MCI) with two copies of APOE4 gene                                     | 2020       | SIAISi001-A  | Female | 66                                | Non-integrating Sendai virus mediated reprogramming                                         | PBMCs             | Mild cognitive impairment (MCI) |
| 7      |                | Stem Cell Res. | Wang Y et al.                                                                                                                                        | Establishment of TUSMi007-A, an induced pluripotent stem cell (iPSC) line from an 83-year old Chinese Han patient with Alzheimer's disease (AD)                                               | 2018       | TUSMi007-A   | Male   | 83                                | Transgene free, Episomal plasmids                                                           | PBMCs             | AD                              |
| 8      |                | Stem Cell Res  | Muñoz SS et al.                                                                                                                                      | Generation and characterization of human induced pluripotent stem cell lines from a familial Alzheimer's disease PSEN1 A246E patient and a non-demented family member bearing wild-type PSEN1 | 2018       | UOWi002-A    | Female | 75                                | Transgene free                                                                              | Dermal fibroblast | Non-demented control            |
|        |                |                |                                                                                                                                                      |                                                                                                                                                                                               |            | UOWi003-A    |        | 56                                |                                                                                             |                   | Familial AD                     |
| 9      | Stem Cell Res. | Wang Y et al   | Derivation of induced pluripotent stem cells TUSMi006 from an 87-year old Chinese Han Alzheimer's disease patient carrying GRINB and SORL1 mutations | 2018                                                                                                                                                                                          | TUSMi006-A | Male         | 87     | Transgene free, Episomal plasmids | PBMCs                                                                                       | AD                |                                 |

|    |  |                |                  |                                                                                                                                                                                   |      |              |        |    |                                                                                                |                         |                       |
|----|--|----------------|------------------|-----------------------------------------------------------------------------------------------------------------------------------------------------------------------------------|------|--------------|--------|----|------------------------------------------------------------------------------------------------|-------------------------|-----------------------|
| 10 |  | Stem Cell Res. | Martins S et al  | Lymphoblast-derived integration-free iPSC line AD-TREM2-3 from a 74 year-old Alzheimer's disease patient expressing the TREM2 p.R47H variant                                      | 2018 | HHUUKDi004-A | Male   | 74 | Episomal vectors oriP/EBNA-1 backbone containing OCT4, SOX2, KLF4, LIN28, LMYC and a p53 shRNA | Human lymphoblast cell  | AD                    |
| 11 |  | Stem Cell Res. | Lehtonen Š et al | Generation of a human induced pluripotent stem cell line from a patient with a rare A673T variant in amyloid precursor protein gene that reduces the risk for Alzheimer's disease | 2018 | UEFi001-A    | Male   | 65 | Sendai virus delivery of OCT-3/4, KLF-4, SOX-2 and c-MYC genes                                 | Skin fibroblasts        | Protective against AD |
| 12 |  | Stem Cell Res. | Martins S et al  | Lymphoblast-derived integration-free iPSC line AD-TREM2-1 from a 67year-old Alzheimer's disease patient expressing the TREM2 p.R47H variant                                       | 2018 | HHUUKDi003-A | Male   | 67 | Episomal vectors oriP/EBNA-1 backbone containing OCT4, SOX2, KLF4, LIN28 and L-MYC             | Human lymphoblast cells | AD                    |
| 13 |  | Stem Cell Res. | Wang Z et al     | Establishment of induced pluripotent stem cell line (ZZUi010-A) from an Alzheimer's disease patient carrying an APP gene mutation                                                 | 2017 | ZZUi010-A    | Female | 52 | Sendai virus                                                                                   | Fibroblasts             | AD                    |
