# Supplementary material for: iPSCs in Neurodegenerative Disorders: A Unique Platform for Clinical Research and Personalized Medicine
Source: MDPI journal article supplement (doi:10.3390/jpm12091485), 2022-09-10
Supplement: s1 [file s1]

Supplementary Table S3: Clinical Application of induced pluripotent stem cells (iPSCs) in Neurologic Disorders.

| S. No. | Study title                                                                                                           | Identifier  | Intervention               | Involvement of iPSCs                                                                                                                                             | Status                                  | Start date     | Completion date | Participants | Country        |
|--------|-----------------------------------------------------------------------------------------------------------------------|-------------|----------------------------|------------------------------------------------------------------------------------------------------------------------------------------------------------------|-----------------------------------------|----------------|-----------------|--------------|----------------|
| 1      | Creation of a Bank of Fibroblast from Patients with Amyotrophic Lateral Sclerosis: Pilot Study (ALSCELL)              | NCT01639391 | Skin biopsy                | Creation of a repository of fibroblasts from patients with ALS for later induction of iPSCs                                                                      | Completed                               | November 2012  | March 2015      | 19           | France         |
| 2      | Understanding Clinical Phenotype and Collecting Biomarker Samples in C9ORF72 ALS                                      | NCT02686268 | Blood samples              | Induction of iPSCs from patients with C9ORF72 ALS as secondary objective                                                                                         |                                         | February 2015  | October 2018    | 128          | USA            |
| 3      | Development of the Tool " iPSC " for the Functional Study of Mutations Responsible for Mental Retardation (Rementips) | NCT02980302 | Skin biopsy                | Creation of iPSC from human fibroblast with MYT1L mutation                                                                                                       |                                         | September 2015 | September 2017  | 4            | France         |
| 4      | Imaging and BioFluid Biomarkers in Amyotrophic Lateral Sclerosis (TRACK-ALS)                                          | NCT02559869 | Blood samples              | Identification of imaging and biofluid biomarkers in people with ALS as secondary objective                                                                      |                                         | November 2015  | June 2019       | 86           | USA            |
| 5      | Answer ALS: Individualized Initiative for ALS Discovery (AnswerALS)                                                   | NCT02574390 | Blood samples              | Creation repository of iPSCs for ALS gene identification                                                                                                         |                                         | December 2015  | January 2020    | 1049         | USA            |
| 6      | Induced Pluripotent Stem Cells for Niemann Pick Disease (IPSNPABC)                                                    | NCT03883750 | Skin biopsy                | Induction of iPSCs from patients with Niemann-Pick disease with later differentiation into neural cells to study the misfolded proteins in endoplasmic reticulum |                                         | June 2018      | December 2019   | 40           | Pakistan       |
| 7      | Establishment of Human Cellular Disease Models for Wilson Disease (IPSWILSON)                                         | NCT03867526 | Skin biopsy                | Establishment of human cellular disease models for Wilson disease                                                                                                |                                         | June 2018      | December 2019   | 40           | Pakistan       |
| 8      | Studies of Autistic Patients: Gene Networks and Clinical Subtypes                                                     | NCT01092208 | Skin biopsy, blood samples | Induction of iPSCs from patients with Autism and/or Tuberous Sclerosis                                                                                           | Terminated                              | March 2010     | September 2013  | 11           | USA            |
| 9      | Cell-Based Approaches for Modeling and Treating Ataxia-Telangiectasia                                                 | NCT02246491 | Skin biopsy, blood samples | Induction of iPSCs from patients with Ataxia-Teleangiectasia                                                                                                     |                                         | February 2015  | July 2018       | 6            | USA            |
| 10     | Stem Cells in NF1 Patients with Tumors of the Central Nervous System                                                  | NCT03332030 | Blood samples              | Establish an iPSCs bank for phenotypically well-characterized patients with neurofibromatosis type I                                                             | Suspended (due to cessation of funding) | November 2015  | July 2025       | 20           | USA            |
| 11     | Establishing of Neuronal-like Cells from Patients with Cisplatin-Induced Peripheral Neuropathy                        | NCT02492360 | Blood samples              | Samples taken for future creation of iPSC to create a model for cisplatin-induced peripheral neuropathy                                                          | Withdrawn                               | December 2017  | December 2019   | 0            | USA            |
| 12     | Generation of a Cellular Model of CADASIL From Skin Fibroblasts                                                       | NCT02032225 | Skin biopsy                | Induction of iPSCs from patients with CADASIL for later differentiation into vascular smooth muscle cells                                                        | Unknown                                 | February 2014  | August 2018     | 10           | France         |
| 13     | Painful Channelopathies Study (PCS)                                                                                   | NCT02696746 | Skin biopsy                | Creation of iPSCs from patients with heritable pain syndromes as secondary objective                                                                             |                                         | February 2012  | June 2021       | 100          | United Kingdom |
| 14     | Multi-Omics and iPSCs to Improve Diagnosis of Rare Intellectual Disabilities (MIDRID)                                 | NCT03635294 | Blood samples              | Derivation of iPSC-derived neural progenitors from patients with intellectual disability for whole genome sequencing                                             |                                         | January 2019   | March 2020      | 6            | France         |

|    |                                                                                                                                                                                           |             |                            |                                                                                                                                           |        |               |               |      |           |
|----|-------------------------------------------------------------------------------------------------------------------------------------------------------------------------------------------|-------------|----------------------------|-------------------------------------------------------------------------------------------------------------------------------------------|--------|---------------|---------------|------|-----------|
| 15 | Establishment of Genetic Basis for Neurological Disease by Genetic Screening                                                                                                              | NCT03322306 | Skin biopsy                | Establishment of disease-specific iPSCs repositories from hereditary neurological diseases                                                | Others | November 2012 | December 2025 | 200  | Hong Kong |
| 16 | Derivation of Human Induced Pluripotent Stem (iPS) Cells to Heritable Cardiac Arrhythmias                                                                                                 | NCT02413450 | Skin biopsy, blood samples | Induction of iPSCs from patients with hereditary cardiac arrhythmias for later differentiation into cardiomyocytes                        |        | August 2013   | August 2025   | 100  | USA       |
| 17 | Study of Neurodegenerative Diseases Induced Stem Cells in Patients and Healthy Family Controls. (NeuronsiPS)                                                                              | NCT03682458 | Blood samples              | Induction of iPSCs for later differentiation into neurons and glia for the study of the pathological mechanisms underlying neuropathology |        | October 2019  | October 2022  | 50   | Italy     |
| 18 | Comprehensive Analysis Platform To Understand, Remedy and Eliminate ALS (CAPTURE ALS)                                                                                                     | NCT05204017 | Blood samples              | Creation of a repository of iPSCs from patients with ALS as secondary objective                                                           |        | January 2022  | August 2023   | 150  | Canada    |
| 19 | Biometric and Biological Data for Diagnosis and Therapy of Pain Patients (Bio2Treat)                                                                                                      | NCT04835779 | Blood samples              | Induction of iPSCs from patients with small fiber neuropathy for later differentiation into sensory neurons as secondary objective        |        | October 2010  | October 2023  | 48   | Germany   |
| 20 | Prospective Evaluation of Infants With Spinal Muscular Atrophy: (SPOTSMA)                                                                                                                 | NCT02831296 | Skin biopsy, blood samples | Creation of a repository of iPSCs from patients with spinal muscular atrophy as secondary objective                                       |        | February 2016 | March 2022    | 1000 | USA       |
| 21 | FOXP1 Syndrome: The Seaver Autism Center for Research and Treatment is Characterizing FOXP1-related Neurodevelopmental Disorders Using Genetic, Medical, and Neuropsychological Measures. | NCT03718923 | Blood samples              | Creation of iPSCs from patients with FOXP1 syndrome as secondary objective                                                                |        | March 2016    | March 2023    | 30   | USA       |
| 22 | The Crnic Institute Human Trisome Project Biobank (HTP)                                                                                                                                   | NCT02864108 | Blood samples              | Creation of a repository of iPSCs from patients with Down's Syndrome                                                                      |        | July 2016     | July 2036     | 1500 | USA       |
| 23 | DDX3X Syndrome -The Seaver Autism Center for Research and Treatment is Characterizing DDX3X-related Neurodevelopmental Disorders Using Genetic, Medical, and Neuropsychological Measures. | NCT03718910 | Blood samples              | Creation of iPSCs from patients with DDX3X syndrome as secondary objective                                                                |        | May 2018      | August 2024   | 10   | USA       |
| 24 | iPSC-based Drug Repurposing for ALS Medicine (iDReAM) Study                                                                                                                               | NCT04744532 | Drug: Bosutinib            | iPSC-based drug repurposing of bosutinib in patients with ALS                                                                             |        | March 2019    | March 2022    | 24   | Japan     |

|    |                                                                                                                                                    |             |                                |                                                                                                   |  |               |               |      |        |
|----|----------------------------------------------------------------------------------------------------------------------------------------------------|-------------|--------------------------------|---------------------------------------------------------------------------------------------------|--|---------------|---------------|------|--------|
| 25 | Diagnosis of RSTS: Identification of the Acetylation Profiles as Epigenetic Markers for Assessing Causality of CREBBP and EP300 Variants. (GENEPI) | NCT04122742 | Skin biopsy                    | Induction of iPSCs from patients with Rubinstein-Taybi syndrome for histone acetylation profiling |  | October 2019  | October 2022  | 154  | France |
| 26 | Classification, Functional Stratification and Biomarkers in Ciliopathy (CILLICORIRCM)                                                              | NCT04874909 | Blood samples                  | Induction of iPSCs from patients with ciliopathies                                                |  | January 2021  | January 2024  | 240  | France |
| 27 | Development of iPS From Donated Somatic Cells of Patients With Neurological Diseases                                                               | NCT00874783 | Skin biopsy, hair samples      | Creation of iPSCs repository from patients with neurodegenerative disorders                       |  | April 2009    | December 2025 | 120  | Israel |
| 28 | Characterization of Patients With Uncommon Presentations and/or Uncommon Diseases Associated With the Cardiovascular System                        | NCT01143454 | Blood samples                  | Induction of iPSCs from patients at risk for cardiovascular diseases as secondary objective       |  | July 2010     | N/A           | 5000 | USA    |
| 29 | Derivation of Induced Pluripotent Stem Cells From an Existing Collection of Human Somatic Cells                                                    | NCT00801333 | Cells from existing collection | Creation of iPSCs repository from patients with ALS                                               |  | November 2008 | December 2025 | 25   | Israel |
| 30 | Biomarkers for Pain in Spinal Cord Injury (SCI) Patients (SCI Pain)                                                                                | NCT00913471 | Skin biopsy, blood samples     | Induction of iPSCs from patients with Traumatic Spinal Cord Injury as secondary objective         |  | June 2009     | December 2030 | 120  | USA    |
