# Supplementary material for: iPSCs in Neurodegenerative Disorders: A Unique Platform for Clinical Research and Personalized Medicine
Source: MDPI journal article supplement (doi:10.3390/jpm12091485), 2022-09-10
Supplement: s1 [file s1]

Supplementary Table S1: Case Report published for Parkinson's disease in PUBMED

| S. No. | Article Type | Journal                  | Author               | Topic                                                                                                                                                                                                                                    | Year | Cell line                  | Gender | Age           | Reprogramming                                                                                                              | Source           | Disease                                                   |
|--------|--------------|--------------------------|----------------------|------------------------------------------------------------------------------------------------------------------------------------------------------------------------------------------------------------------------------------------|------|----------------------------|--------|---------------|----------------------------------------------------------------------------------------------------------------------------|------------------|-----------------------------------------------------------|
| 1      | Case Report  | Stem Cell Res.           | Chen ZT et al.       | Generation of an induced pluripotent stem cell line, FJMUUHi001-A, from a hereditary Parkinson's disease patient with homozygous mutation of c.189dupA in PARK7                                                                          | 2021 | FJMUUHi001-A               | Male   | 32            | Electrotransfection with 4 episomal vectors with 5-reprogramming-factor genes (OCT3/4, SOX2, c-MYC, KLF4, and BCL-XL)      | PBMCs            | Parkinson's disease                                       |
| 2      |              | N Engl J Med.            | Schweitzer JS et al. | Personalized iPSC-Derived Dopamine Progenitor Cells for Parkinson's Disease.                                                                                                                                                             | 2020 | C4-mDAPs, H9-mDAPs         | Male   | 69            | Direct delivery of Oct4, Sox2, Klf4, and c-Myc fused with cell penetrating peptide                                         | Skin fibroblasts | Idiopathic Parkinson's disease                            |
| 3      |              | Stem Cell Res.           | Larsen SB et al.     | Induced pluripotent stem cell line (LCSBi001-A) derived from a patient with Parkinson's disease carrying the p.D620N mutation in VPS35                                                                                                   | 2020 | LCSBi001-A                 | Male   | 76            | CytoTune™-iPS 2.0 Sendai Reprogramming Kit                                                                                 | Skin fibroblasts | VPS35 p.D620N mutation associated Parkinson's disease     |
| 4      |              | Stem Cell Res.           | Chen M et al.        | Generation of an induced pluripotent stem cell line (DANi-011A) from a Parkinson's disease patient with a LRRK2 p.G2019S mutation                                                                                                        | 2020 | DANi-011A                  | Female | 70            | Non-integrating Sendai virus with POU5F1, SOX2, KLF4 and MYCL                                                              | Skin fibroblasts | Parkinson's disease 8                                     |
| 5      |              | Stem Cell Res.           | Azevedo C et al.     | Generation of an induced pluripotent stem cell line (CSC-32) from a patient with Parkinson's disease carrying a heterozygous variation p.A53T in the SNCA gene                                                                           | 2020 | CSC-32                     | Male   | 45            | Non-integrating Sendai virus with OCT3/4, SOX2, c-MYC and KLF4                                                             | Skin fibroblasts | SNCA mutation associated Parkinson's disease              |
| 6      |              | Acta Neuropathol Commun. | Chumari na M et al.  | Cellular alterations identified in pluripotent stem cell-derived midbrain spheroids generated from a female patient with progressive external ophthalmoplegia and parkinsonism who carries a novel variation (p.Q811R) in the POLG1 gene | 2019 | CSC-35E, CSC-35P, CSC-35 V | Female | 38            | Sendai virus delivery of OCT3/4, KLF-4, SOX-2 and c-MYC                                                                    | Skin fibroblasts | POLG1 mutation associated early onset Parkinson's disease |
| 7      |              | Bull Exp Biol Med.       | Vetchinova AS et al. | Cytogenetic Analysis of the Results of Genome Editing on the Cell Model of Parkinson's Disease                                                                                                                                           | 2018 | N/A Not specified          | Male   | N/A Not given | Vectors and single-stranded donor DNA Molecules delivered by Lipophilic transfection (TurboFect, Thermo Fisher Scientific) | Skin fibroblasts | Parkinson's disease 8                                     |
| 8      |              | Stem Cell Res.           | Lee SY               | Generation of gene-corrected iPSC line from Parkinson's disease patient iPSC line with alpha-SNCA A53T mutation                                                                                                                          | 2018 | KIOMi001-A                 | Female | 51            | Episomal plasmids (pCXLE-hOCT3/4-shp53, pCXLE-hU, pCXLE-hSK)                                                               | Skin fibroblasts | $\alpha$ -SNCA mutation associated Parkinson's disease    |
| 9      |              | Stem Cell Res.           | Wang Y et al.        | Generation of induced pluripotent stem cell line (ZZUi005-A) from a 21-year-old patient with a novel RAB39B gene mutation in X-linked juvenile parkinsonism                                                                              | 2017 | ZZUi005-A                  | Male   | 21            | Sendai virus                                                                                                               | Skin fibroblasts | RAB39B mutation associated X-linked Parkinson's disease   |

|    |  |                            |                  |                                                                                                                                        |      |     |      |    |                                                                                                                        |                  |                                                        |
|----|--|----------------------------|------------------|----------------------------------------------------------------------------------------------------------------------------------------|------|-----|------|----|------------------------------------------------------------------------------------------------------------------------|------------------|--------------------------------------------------------|
| 10 |  | Parkinsonism Relat Disord. | Mishima T et al. | Cytoplasmic aggregates of dynactin in iPSC-derived tyrosine hydroxylase-positive neurons from a patient with Perry syndrome            | 2016 | N/A | Male | 61 | Episomal vectors carrying OCT3/4, SOX2, KLF4, L-MYC, LIN28, EBNA1, and p53 carboxy-terminal dominant-negative fragment | PBMCs            | Perry syndrome                                         |
| 11 |  | PLoS One                   | Byers B et al.   | SNCA triplication Parkinson's patient's iPSC-derived DA neurons accumulate $\alpha$ -synuclein and are susceptible to oxidative stress | 2011 | N/A | Male | 48 | Retroviral gene instertion of OCT4, SOX2, KLF4 and c-MYC                                                               | Skin fibroblasts | $\alpha$ -SNCA mutation associated Parkinson's disease |
